# Supplementary material
Source: PubMed Central journal article supplement (PMC2704718)
Supplement: supp_191_14_4555__1.pdf [file supp_191_14_4555__1.pdf]

TABLE S1. *Bacillus subtilis* strains used in this study

| Strain  | Characteristics or genotype                           | Source or reference |
|---------|-------------------------------------------------------|---------------------|
| 168     | <i>trpC2</i>                                          | Laboratory stock    |
| RIK350  | <i>trpC2 rrnA2+::catpt1</i>                           | This study          |
| RIK351  | <i>trpC2 rrnB2+::catpt1</i>                           | This study          |
| RIK352  | <i>trpC2 rrnD2+::catpt1</i>                           | This study          |
| RIK353  | <i>trpC2 rrnE2+::catpt1</i>                           | This study          |
| RIK354  | <i>trpC2 rrnI2+::catpt1</i>                           | This study          |
| RIK355  | <i>trpC2 rrnJ2+::catpt1</i>                           | This study          |
| RIK356  | <i>trpC2 rrnO2+::catpt1</i>                           | This study          |
| RIK900  | <i>trpC2 relA::erm</i>                                | (26)                |
| RIK901  | <i>trpC2 rrnA2+::catpt1 relA::erm</i>                 | This study          |
| RIK902  | <i>trpC2 rrnB2+::catpt1 relA::erm</i>                 | This study          |
| RIK903  | <i>trpC2 rrnD2+::catpt1 relA::erm</i>                 | This study          |
| RIK904  | <i>trpC2 rrnE2+::catpt1 relA::erm</i>                 | This study          |
| RIK905  | <i>trpC2 rrnI2+::catpt1 relA::erm</i>                 | This study          |
| RIK906  | <i>trpC2 rrnJ2+::catpt1 relA::erm</i>                 | This study          |
| RIK907  | <i>trpC2 rrnO2+::catpt1 relA::erm</i>                 | This study          |
| RIK908  | <i>trpC2 ywaC::spc</i>                                | (26)                |
| RIK1000 | <i>trpC2 ΔyjbM</i>                                    | (26)                |
| RIK1002 | <i>trpC2 ΔyjbM ywaC::spc</i>                          | (26)                |
| RIK1023 | <i>trpC2 rrnA2+::catpt1 relA::erm ywaC::spc</i>       | This study          |
| RIK1024 | <i>trpC2 rrnB2+::catpt1 relA::erm ywaC::spc</i>       | This study          |
| RIK1025 | <i>trpC2 rrnD2+::catpt1 relA::erm ywaC::spc</i>       | This study          |
| RIK1026 | <i>trpC2 rrnE2+::catpt1 relA::erm ywaC::spc</i>       | This study          |
| RIK1027 | <i>trpC2 rrnI2+::catpt1 relA::erm ywaC::spc</i>       | This study          |
| RIK1028 | <i>trpC2 rrnJ2+::catpt1 relA::erm ywaC::spc</i>       | This study          |
| RIK1029 | <i>trpC2 rrnO2+::catpt1 relA::erm ywaC::spc</i>       | This study          |
| RIK1030 | <i>trpC2 rrnA2+::catpt1 relA::erm ΔyjbM</i>           | This study          |
| RIK1031 | <i>trpC2 rrnB2+::catpt1 relA::erm ΔyjbM</i>           | This study          |
| RIK1032 | <i>trpC2 rrnD2+::catpt1 relA::erm ΔyjbM</i>           | This study          |
| RIK1033 | <i>trpC2 rrnI2+::catpt1 relA::erm ΔyjbM</i>           | This study          |
| RIK1034 | <i>trpC2 rrnE2+::catpt1 relA::erm ΔyjbM</i>           | This study          |
| RIK1035 | <i>trpC2 rrnJ2+::catpt1 relA::erm ΔyjbM</i>           | This study          |
| RIK1036 | <i>trpC2 rrnO2+::catpt1 relA::erm ΔyjbM</i>           | This study          |
| RIK1044 | <i>trpC2 rrnA2+::catpt1 relA::erm ywaC::spc ΔyjbM</i> | This study          |

|         |                                                       |            |
|---------|-------------------------------------------------------|------------|
| RIK1045 | <i>trpC2 rrnB2+::catpt1 relA::erm ywaC::spc ΔyjbM</i> | This study |
| RIK1046 | <i>trpC2 rrnD2+::catpt1 relA::erm ywaC::spc ΔyjbM</i> | This study |
| RIK1047 | <i>trpC2 rrnE2+::catpt1 relA::erm ywaC::spc ΔyjbM</i> | This study |
| RIK1048 | <i>trpC2 rrnI2+::catpt1 relA::erm ywaC::spc ΔyjbM</i> | This study |
| RIK1049 | <i>trpC2 rrnJ2+::catpt1 relA::erm ywaC::spc ΔyjbM</i> | This study |
| RIK1050 | <i>trpC2 rrnO2+::catpt1 relA::erm ywaC::spc ΔyjbM</i> | This study |

---
