# Supplementary material
Source: PubMed Central journal article supplement (PMC2704718)
Supplement: supp_191_14_4555__2.pdf [file supp_191_14_4555__2.pdf]

TABLE S2. Oligonucleotide primers used in this study.

For the construction of RIK 350, RIK351, RIK352, RIK353, RIK354, RIK355 and RIK356

|             |                                                          |
|-------------|----------------------------------------------------------|
| rrnA-cat F1 | 5'-GAAAAGGTTGTTGAAGGAAGTGCAGGCGGCGGTATGGTAA -3'          |
| rrnA-cat R1 | 5'-CCTCCTAAATTTTTATCTAAAGTGGTTTAAGCGACTTTATTATCATAAC -3' |
| rrnA-cat F2 | 5'-AGGCCTAATGACTGGCTTTTATAAGAGCGGTAAACAAAGTTCTTTGAAA -3' |
| rrnB-cat F1 | 5'-AAAGTCGCTCGTTAAAGGGAGTATTTGTTGCTCAGGACGA-3'           |
| rrnB-cat R1 | 5'-CCTCCTAAATTTTTATCTAAAGTGAATGAAGCAGCTTTACTAATATAAC-3'  |
| rrnB-cat F2 | 5'-AGGCCTAATGACTGGCTTTTATAAGAGAAGTAACGAAATGATCTTTGAAA-3' |
| rrnD-cat F1 | 5'-TCTCGGCAATGCATGCACATATCGACTACTCCTAAAACCT-3'           |
| rrnD-cat R1 | 5'-CCTCCTAAATTTTTATCTAAAGTGGTTGTTGAAGCGACTTTATTAATATA-3' |
| rrnD-cat F2 | 5'-AGGCCTAATGACTGGCTTTTATAAGAAGTGAAAATGATCTTTGAAAACCT-3' |
| rrnE-cat F1 | 5'-CGATCAATGGATACGATCAGCTAACAGCGCTTAATAAACCC-3'          |
| rrnE-cat R1 | 5'-CCTCCTAAATTTTTATCTAAAGTGTGAGCGACTTAACTATCATACTATC-3'  |
| rrnE-cat F2 | 5'-AGGCCTAATGACTGGCTTTTATAAATAAGCGCCCGTAGCTCAATTGGAT-3'  |
| rrnI-cat F1 | 5'-GCGCTTATCACGAGTATTGTGGGTTTTGCTTTAAAGTGGG-3'           |
| rrnI-cat R1 | 5'-CCTCCTAAATTTTTATCTAAAGTGTTAACGAAGCAGCTTTATTACTATA-3'  |
| rrnI-cat F2 | 5'-AGGCCTAATGACTGGCTTTTATAAGCGGCAGTAATGATCTTTGAAAACCT-3' |
| rrnJ-cat F1 | 5'-CATGATGACAAAACGCGGCAAAGGAAAAGCCGGCTTTGCC-3'           |
| rrnJ-cat R  | 5'-CCTCCTAAATTTTTATCTAAAGTGTTTCGTTCAAGCGACTTTATTATTAT-3' |
| rrnJ-cat F2 | 5'-AGGCCTAATGACTGGCTTTTATAAGTGAACAAAATGATCTTTGAAAACCT-3' |
| rrnO-cat F1 | 5'-CACTGGATCATCTCGATGCAGTTATCTCCCTTATCCGTAA-3'           |
| rrnO-cat R1 | 5'-CCTCCTAAATTTTTATCTAAAGTGTCTCAAAGCGACTACTTAATAGTAA-3'  |
| rrnO-cat F2 | 5'-AGGCCTAATGACTGGCTTTTATAAGAAGCACACAAAGTTCTTTGAAAAC-3'  |
| rrnX-catR2  | 5'-AGAAAGGAGGTGATCCAGCCGCACCTTCCGATACGGCTAC-3'           |
| CAT-F2      | 5'-CACTTTAGATAAAAATTTAGGAGGC-3'                          |
| CAT-R       | 5'-TTATAAAAGCCAGTCATTAGGCCTA-3'                          |

For primer extension analysis

|             |                                   |
|-------------|-----------------------------------|
| rrn-in-cat2 | 5'-CTCTCCGTCGCTATTGTAACCAGTTC -3' |
|-------------|-----------------------------------|

For the generation of the template DNA used for sequencing ladder

|              |                                   |
|--------------|-----------------------------------|
| rrnA-ladderF | 5'-GTGCCGATTAATCTGGTTACAACAG-3'   |
| rrnB-ladderF | 5'-GCTCCCCTTGTGGTCATCAGTATTT-3'   |
| rrnD-ladderF | 5'-CTTGACGGAAAAGGGACTTATCAAC-3'   |
| rrnE-ladderF | 5'-TTAGCAGCTGCCGGGTCTGGCTTGT-3'   |
| rrnI-ladderF | 5'-GTGATTCACTGATGATGCCTCCTTA-3'   |
| rrnJ-ladderF | 5'-CTGTTATTCCCGCAAATGAGACAACGC-3' |
| rrnO-ladderF | 5'-GAGCATGTTGCTACAGTAGCTTTAG-3'   |

ladderR

5'-CTCTCCGTCGCTATTGTAACCAGTTC-3'

---
